# Supplementary material
Source: PubMed Central journal article supplement (PMC9487612)
Supplement: aac.00904-22-s0002.pdf [file aac.00904-22-s0002.pdf]

Supplemental material for “Mutations in *rv0678* confer low-level resistance to benzothiazinone DprE1 inhibitors in *M. tuberculosis*” by Poulton et al.

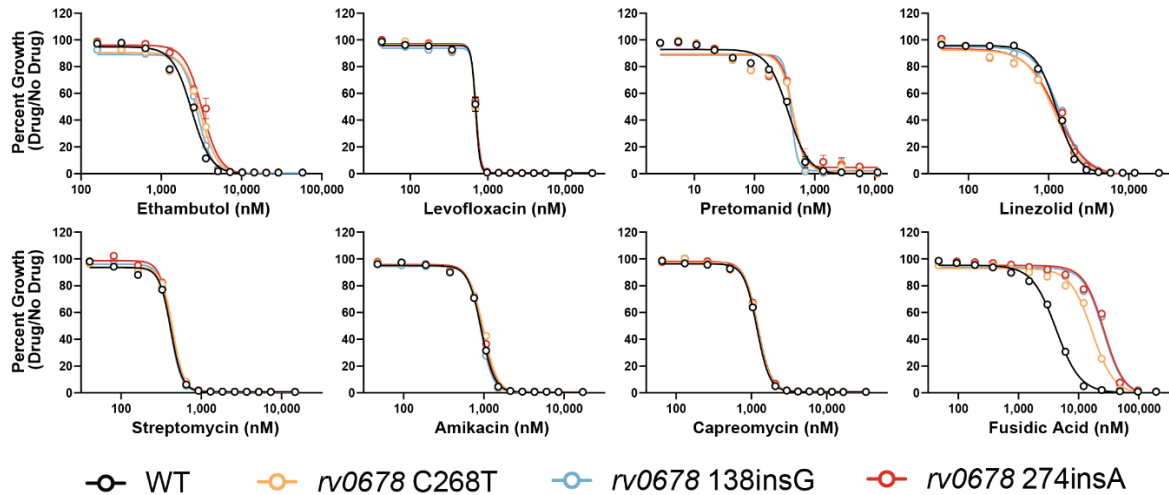

**Figure S1. Antibiotic susceptibility of *rv0678* mutants.** Dose-response curves (mean  $\pm$  s.e.m.,  $n = 3$  replicates) for the indicated *Mtb* strains. Results are representative of two independent experiments.

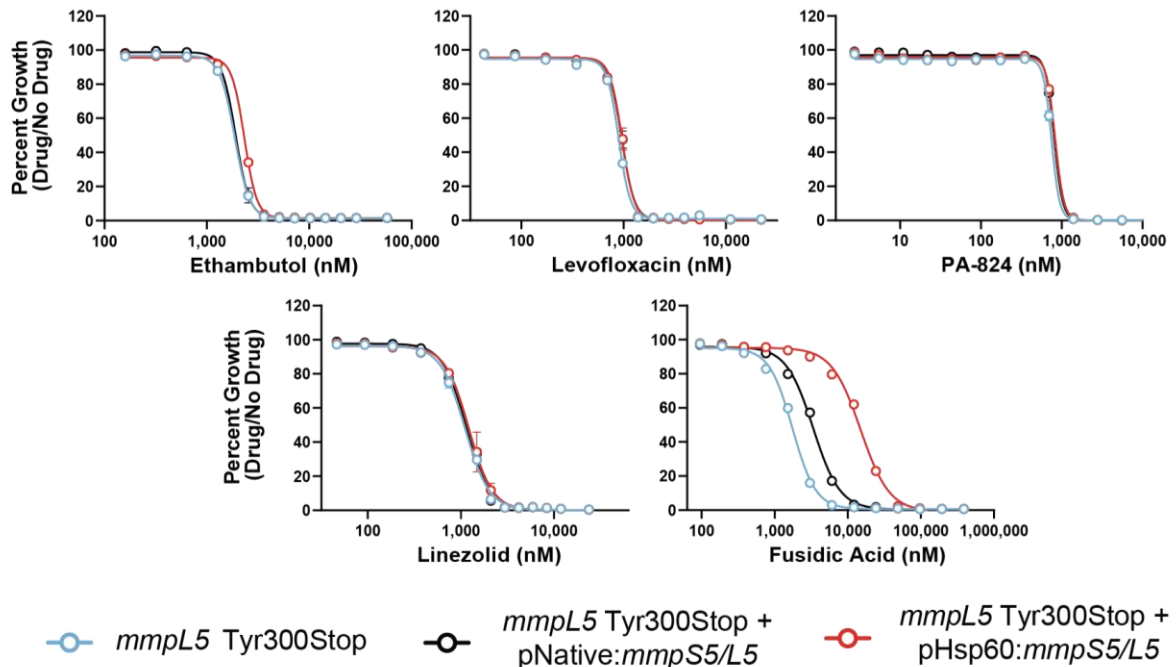

**Figure S2. Antibiotic susceptibility of *mmpL5* loss-of-function and gain-of-function strains.** Dose-response curves (mean  $\pm$  s.e.m.,  $n = 3$  replicates) for the indicated *Mtb* strains. Results are representative of two independent experiments.

**Table S1:** Oligonucleotides used in this study

| Sequence <sup>a</sup>                                                                   | Use                                              |
|-----------------------------------------------------------------------------------------|--------------------------------------------------|
| gtcgccagttcctccgaggactgccgctcgggatc<br><u>C</u> acacaccagcagccagcccaacaatcgacc<br>gcc   | <i>rv0678</i> 138insG ssDNA recombineering oligo |
| gccagccgcgaaagcgttgggcccgaaccgga<br>aatT <u>a</u> ggtgcgccgatccccggcgaccgcgagc<br>cgctc | <i>rv0678</i> 274insA recombineering oligo       |
| cgcgaaagcgttgggcccgaaccggaaataggt<br>gc <u>A</u> ccgatccccggcgaccgcgagccgctcaat<br>gaac | <i>rv0678</i> C268T recombineering oligo         |
| tgagagttccaatcatcgcc                                                                    | <i>rv0678</i> amplification primer (forward)     |
| caacaaggagtgaccacaggc                                                                   | <i>rv0678</i> amplification primer (reverse)     |
| catgaagttcacgccggtct                                                                    | <i>rv0678</i> sanger sequencing primer           |

<sup>a</sup> For ssDNA recombineering oligonucleotides, the mutation-conferring nucleotide is underlined.

**Table S2:** Antimicrobial compounds used in this study

| Antibiotic                             | Product number                   |
|----------------------------------------|----------------------------------|
| Amikacin                               | A0365900 (Sigma Aldrich)         |
| Anhydrotetracycline                    | AC233135000 (Fisher Scientific)  |
| Bedaquiline                            | A12327-5 (AdooQ Biosciences)     |
| BTZ043                                 | 22930 (Cayman Chemical)          |
| Capreomycin Sulfate                    | PHR1716 (Sigma Aldrich)          |
| Clofazimine                            | TCC2866 (VWR)                    |
| Ethambutol dihydrochloride             | E4630 (Sigma Aldrich)            |
| Fusidic acid sodium salt               | F0881 (Sigma Aldrich)            |
| IN-2 DprE1 inhibitor (compound 18(47)) | HY-100531 (MedChem Express)      |
| Isoniazid                              | I3377 (Sigma Aldrich)            |
| Kanamycin                              | K-120-50 (GoldBio)               |
| Levofloxacin                           | 28266 (Sigma Aldrich)            |
| Linezolid                              | SML1290 (Sigma Aldrich)          |
| PBTZ169                                | 22202 (Cayman Chemical)          |
| Rifampicin                             | R0079 (TCI)                      |
| Streptomycin sulfate                   | S-150-100 (GoldBio)              |
| TCA-1 (DprE1 inhibitor)                | 50-589-30001 (Fisher Scientific) |
| Zeocin                                 | J67140-8EQ (Alfa Aesar)          |
